# Supplementary material for: An electrochemical immunosensor based on a multiple signal amplification strategy for highly sensitive detection of prostate specific antigen
Source: Royal Society of Chemistry journal article supplement (doi:10.1039/c8ay01533c), 2018-01-01
Supplement: c8ay01533c1.pdf [file c8ay01533c1.pdf]

**Electrochemical immunosensor based on a multiple signal amplification strategy  
for highly sensitive detection of prostate specific antigen**

**Li Liu, Guanhui Zhao, Xue Dong, Xuan Li, Weiyang Lu, Qin Wei, Wei Cao\***

Key Laboratory of Interfacial Reaction & Sensing Analysis in Universities of  
Shandong,  
School of Chemistry and Chemical Engineering,  
University of Jinan,  
Jinan 250022, P.R. China

\*Corresponding author. Tel.: +86-53182767890; fax: +86-53187161600.

E-mail address: jncw88@163.com (W. Cao), jn\_chm302@163.com

## Reagents and apparatuses

Human PSA antibody ( $Ab_1$ ,  $Ab_2$ ) and antigen were purchased from Biocell Science Co., Ltd. (Shanghai, China). Bovine serum albumin (BSA, 96-99%) was bought from Sigma Reagent Co., Ltd. (St. Louis, MO, USA). Cobalt chloride ( $CoCl_2 \cdot 6H_2O$ ), copper chloride ( $CuCl_2 \cdot 2H_2O$ ) and 3-aminopropyl-triethoxysilane (APTES, 98%) were purchased from Shanghai Aladdin Chemistry Co., Ltd. (Shanghai, China).  $H AuCl_4 \cdot 4H_2O$  was obtained from Sinopharm Chemical Reagent Shanghai Co., Ltd., China. Phosphate buffer saline (PBS) was prepared by using  $1/15 \text{ mol L}^{-1} Na_2HPO_4$  and  $1/15 \text{ mol L}^{-1} KH_2PO_4$  solution and used as an electrolyte for all electrochemical measurement. All other reagents are at analytical grade and used directly without further purification. Ultrapure water ( $18.25 \text{ M}\Omega$ ,  $25 \text{ }^\circ\text{C}$ ) was used throughout the study.

All electrochemical measurements were operated on a CHI760D electrochemical workstation (Chenhua Instrument Shanghai Co., Ltd., China). A saturated calomel electrode (SCE), a platinum wire electrode and a glassy carbon electrode (GCE) (4 mm in diameter) were used as reference, counter, working electrodes. The surface morphology of nanomaterial was observed using a JSM-6700F scanning electron microscopy (SEM). Transmission electron microscopic (TEM) image was obtained from a JEOL-1400 microscope (Japan). The presented elements of the nanocomposite were obtained using Energy Dispersive X-ray Spectroscopy (EDX).

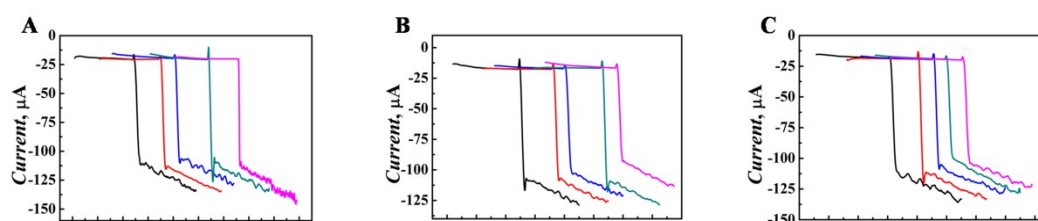

Fig. S1 The electrocatalytic current responses of the immunosensor after addition of  $\text{H}_2\text{O}_2$  correspond to reproducibility, selectivity and stability.

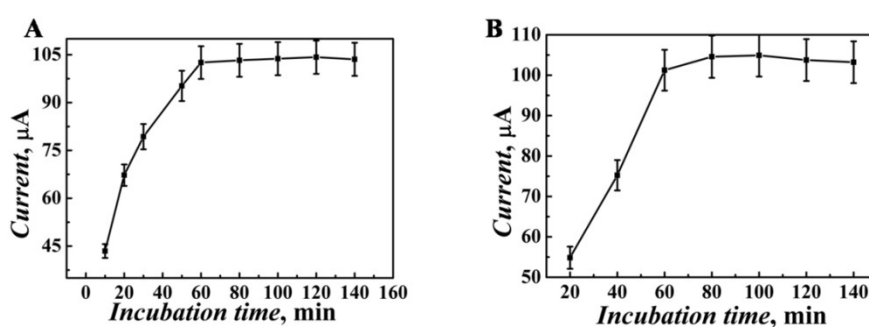

Fig. S2 Effect of incubation time between PSA and  $\text{Ab}_1$  (A) and between PSA and  $\text{Ab}_2\text{-Pd@Pt-APTES-Cu}_2\text{O@Co}_3\text{O}_4$  (B) on the electrocatalytic current response of the immunosensor for the detection of  $1 \text{ ng mL}^{-1}$  PSA. Error bar=RSD ( $n=5$ ).

Table S1 Assay results of clinical serum samples using the immunosensor and standard ELISA methods (ng/mL)

| Sample             | 1    | 2    | 3    |
|--------------------|------|------|------|
| Immunosensor       | 0.83 | 1.29 | 2.32 |
| ELISA              | 0.79 | 1.32 | 2.25 |
| Relative error (%) | 4.8  | -2.3 | 3.0  |

### Function of BSA

In order to prove the effect of BSA on eliminating nonspecific binding, we operated a comparative experiment.

Firstly, the GCE was polished with 1.0, 0.3 and 0.05  $\mu\text{m}$  alumina powder successively and cleaned thoroughly before use. Then, 6  $\mu\text{L}$  of Au-CS-Gr solution was dropped on the electrode surface and dried at room temperature. Subsequently, 6  $\mu\text{L}$  of 10  $\mu\text{g mL}^{-1}$   $\text{Ab}_1$  was added onto the electrode and incubated for 1 h. For comparison, after washing with PBS (pH=7.4), 3  $\mu\text{L}$  of 1% BSA was modified on one electrode and another one was not added. Finally, 6  $\mu\text{L}$  of 1.8  $\text{mg mL}^{-1}$   $\text{Ab}_2\text{-Pd@Pt-APTES-Cu}_2\text{O@Co}_3\text{O}_4$  dispersion was dropped onto the modified electrode and incubated for one more hour. Amperometric *i-t* curve was used to record the electrocatalytic current signal with the constant scanning potential at -0.4 V. 10  $\mu\text{L}$  of 5  $\text{mmol L}^{-1}$   $\text{H}_2\text{O}_2$  was added in the PBS at pH=6.8 when the background current was stable. The experiment result was shown in Fig. S3. It exhibited very low current response when 3  $\mu\text{L}$  of 1% BSA was added on the electrode (curve a). This phenomenon can be explained as BSA blocked the non-specific binding sites.  $\text{Ab}_2\text{-Pd@Pt-APTES-Cu}_2\text{O@Co}_3\text{O}_4$  was hardly modified on the electrode. However, the electrode showed a significant current response without BSA added (curve b). This is caused by the adsorption of  $\text{Ab}_2\text{-Pd@Pt-APTES-Cu}_2\text{O@Co}_3\text{O}_4$  onto the electrode surface and the substrate material. Therefore, BSA ensured specific binding of antigen to antibody by eliminating nonspecific binding.

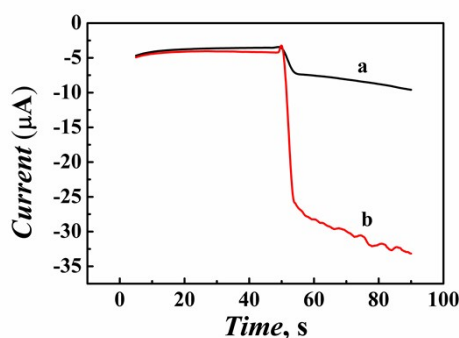

Fig. S3 The Amperometric *i-t* curve of the electrode with 3  $\mu\text{L}$  of 1% BSA added (a) and without 3  $\mu\text{L}$  of 1% BSA added (b).
